# Supplementary material
Source: PubMed Central journal article supplement (PMC8741737)
Supplement: NIHMS1753734-supplement-Supplementary_Tables.pdf [file NIHMS1753734-supplement-Supplementary_Tables.pdf]

**Supplementary Table1. The list of antibodies for CyTOF.**

| Antibodies                                 | Source                   | Identifier                            |
|--------------------------------------------|--------------------------|---------------------------------------|
| anti-mouse CCR2, 156Gd, monoclonal         | R&D                      | Cat# MAB55381-100;<br>RRID:AB_2749828 |
| anti-mouse CD45, 89Y, monoclonal           | FDM                      | Cat# 3089005B;<br>RRID:AB_2651152     |
| anti-mouse CD11c, 209Bi, monoclonal        | FDM                      | Cat# 3142003B;<br>RRID:AB_2814737     |
| anti-mouse CD11b, 148Nd, monoclonal        | FDM                      | Cat# 3143015B;<br>RRID:AB_2811240     |
| anti-mouse I-A/I-E, 150Nd, monoclonal      | Biolegend                | Cat# 107637;<br>RRID:AB_2563771       |
| anti-mouse CD86, 151Eu, monoclonal         | Biolegend                | Cat# 105001;<br>RRID:AB_313144        |
| anti-mouse MERTK, 153Eu, monoclonal        | R&D                      | Cat# MAB5912-100<br>RRID:AB_2832245   |
| anti-mouse F4/80, 146Nd, monoclonal        | FDM                      | Cat# 3159009B;<br>RRID:AB_2811238     |
| anti-mouse CD64, 160Gd, monoclonal         | R&D                      | Cat# MAB20741;<br>RRID:AB_2246880     |
| anti-mouse Ly6G, 161Dy, monoclonal         | Biolegend                | Cat# 127637;<br>RRID:AB_2563784       |
| anti-mouse SiglecH, 163Dy, monoclonal      | Biolegend                | Cat# 129602;<br>RRID:AB_1227757       |
| anti-mouse CX3CR1, 164Dy, monoclonal       | FDM                      | Cat# 3164023B;<br>RRID:AB_2832247     |
| anti-mouse CD206 (MMR), 169Tm, monoclonal  | FDM                      | Cat# 3169021B;<br>RRID:AB_2832249     |
| anti-mouse CD169, 171 Yb, monoclonal       | Biolegend                | Cat# 142404;<br>RRID:AB_10915697      |
| anti-mouse Ly6C, 111Cd, monoclonal         | Biolegend                | Cat# 128039;<br>RRID:AB_2563783       |
| anti-mouse Iba1, 158Gd, monoclonal         | Abcam                    | Cat# ab178846;<br>RRID:AB_2636859     |
| anti-mouse BDNF, 112 Cd, monoclonal        | Abcam                    | Cat# ab216443;<br>RRID:AB_2892087     |
| anti-mouse TGF $\beta$ , 159Tb, monoclonal | Biolegend                | Cat# 141402;<br>RRID:AB_10719836      |
| anti-mouse pNFkb, 142Nd, monoclonal        | Biolegend                | Cat# 653002;<br>RRID:AB_2561613       |
| anti-mouse IL-1a, 147Sm, monoclonal        | Biolegend                | Cat# 503206;<br>RRID:AB_315284        |
| anti-mouse MCP1, 166Er, monoclonal         | Thermo Fisher Scientific | Cat# MA5-17040;<br>RRID:AB_2538512    |

**Supplementary Table2. A list of the 10 human TREM2 interacting proteins with highest intensity.**

|     | <b>Gene Symbol</b>                  | <b>Protein</b>                                                                                                               | <b>UniProt Accession</b>                |
|-----|-------------------------------------|------------------------------------------------------------------------------------------------------------------------------|-----------------------------------------|
| 1.  | TMPO                                | Lamina-associated polypeptide 2, isoform alpha                                                                               | P42166                                  |
| 2.  | LIG3                                | DNA ligase 3                                                                                                                 | P49916                                  |
| 3.  | BANF1                               | Barrier-to-autointegration factor                                                                                            | O75531                                  |
| 4.  | XRCC1                               | DNA repair protein XRCC1                                                                                                     | P18887                                  |
| 5.  | SUPT16H                             | FACT complex subunit SPT16                                                                                                   | Q9Y5B9                                  |
| 6.  | HIST2H3PS2                          | Histone H3                                                                                                                   | Q5TEC6                                  |
| 7.  | ACTA1;<br>ACTC1;<br>ACTA2;<br>ACTG2 | Actin, alpha skeletal muscle; Actin, alpha cardiac muscle 1; Actin, aortic smooth muscle; Actin, gamma-enteric smooth muscle | P68133;<br>P68032;<br>P62736;<br>P63267 |
| 8.  | CTSF                                | Cathepsin F                                                                                                                  | Q9UBX1                                  |
| 9.  | HELZ                                | Probable helicase with zinc finger domain                                                                                    | P42694                                  |
| 10. | H2AFY                               | Core histone macro-H2A.1                                                                                                     | O75367                                  |

**Supplementary Table3. Basic characteristics of human tissue donors.**

| Mayo ID    | TDP-43 | Thal phase | Duration(year) | Age | Sex |
|------------|--------|------------|----------------|-----|-----|
| ALS1       | 1      | 3          | 5              | 53  | F   |
| ALS2       | 1      | 0          | 2              | 60  | M   |
| ALS3       | 1      | 0          | 2              | 59  | F   |
| ALS4       | 1      | 0          | 3              | 58  | F   |
| ALS5       | 1      | 0          | 5              | 60  | F   |
| ALS6       | 1      | 0          | 7              | 64  | M   |
| ALS7       | 1      | 0          | 1              | 72  | F   |
| ALS8       | 1      | 1          | 3              | 65  | F   |
| ALS9       | 1      | 1          | 4              | 62  | F   |
| ALS10      | 1      | 4          | 3              | 60  | F   |
| ALS11      | 1      | 0          | NA             | 64  | F   |
| ALS12      | 1      | 2          | NA             | 75  | M   |
| ALS13      | 1      | 3          | NA             | 78  | M   |
| ALS14      | 1      | 2          | NA             | 79  | F   |
| ALS15      | 1      | 1          | NA             | 80  | M   |
| ALS16      | 1      | 3          | NA             | 83  | F   |
| Control 1  | 0      | 0          | NA             | 64  | M   |
| Control 2  | 0      | 3          | NA             | 75  | M   |
| Control 3  | 0      | 3          | NA             | 85  | M   |
| Control 4  | 0      | 0          | NA             | 77  | M   |
| Control 5  | 0      | 0          | NA             | 92  | F   |
| Control 6  | 0      | 0          | NA             | 83  | F   |
| Control 7  | 0      | 0          | NA             | 67  | M   |
| Control 8  | 0      | 0          | NA             | 79  | F   |
| Control 9  | 0      | 0          | NA             | 80  | F   |
| Control 10 | 0      | 0          | NA             | 54  | F   |
| Control 11 | 0      | 0          | NA             | 76  | M   |
| Control 12 | 1      | 0          | NA             | 64  | F   |

ALS: amyotrophic lateral sclerosis
